# Supplementary material for: PDZ-Containing Proteins Targeted by the ACE2 Receptor
Source: MDPI journal article supplement (doi:10.3390/v13112281), 2021-11-15
Supplement: s1 [file s1]

## PDZ-containing proteins targeted by the ACE2 receptor

Célia Caillet-Saguy<sup>1\*</sup> and Nicolas Wolff<sup>1\*</sup>

\* Corresponding authors. E-mails: [celia.caillet-saguy@pasteur.fr](mailto:celia.caillet-saguy@pasteur.fr) and [nicolas.wolff@pasteur.fr](mailto:nicolas.wolff@pasteur.fr)

<sup>1</sup> Institut Pasteur. Unité Récepteurs-Canaux. UMR CNRS 3571. 75015 Paris. France.

**Table S1. All BI values obtained by holdup assay using PBM peptide from ACE2 protein.**

| PDZ name      | BI   | sd   | Kd estimated |
|---------------|------|------|--------------|
| SNX27         | 0.87 | 0.03 | 2.57         |
| SHANK3        | 0.75 | 0.03 | 6.08         |
| MAST2         | 0.72 | 0.06 | 6.96         |
| NHERF2 PDZ2   | 0.67 | 0.05 | 9.30         |
| MAST1         | 0.63 | 0.10 | 10.71        |
| SHANK2        | 0.62 | 0.03 | 11.50        |
| PTPN3         | 0.54 | 0.06 | 16.24        |
| SHANK1        | 0.54 | 0.08 | 16.34        |
| NHERF3 PDZ1   | 0.50 | 0.04 | 19.19        |
| NHERF1 PDZ1   | 0.39 | 0.02 | 31.05        |
| PARD3         | 0.28 | 0.05 | 51.12        |
| SHROOM2 PDZ1  | 0.26 | 0.04 | 55.74        |
| SCRIB PDZ3    | 0.23 | 0.00 | 69.12        |
| GRASP         | 0.20 | 0.01 | 81.33        |
| MAST3 PDZ1    | 0.20 | 0.02 |              |
| RHPN1 PDZ1    | 0.16 | 0.06 |              |
| MAGI1 PDZ5    | 0.16 |      |              |
| NHERF2 PDZ1   | 0.15 | 0.04 |              |
| MAGI3 PDZ5    | 0.14 | 0.06 |              |
| GRID2IP PDZ2  | 0.14 | 0.21 |              |
| PTPN4 PDZ1    | 0.13 | 0.03 |              |
| DLG2 PDZ2     | 0.13 | 0.25 |              |
| GIPC1 PDZ1    | 0.12 | 0.22 |              |
| NHERF PDZ2    | 0.11 | 0.05 |              |
| FRMPD4 PDZ1   | 0.11 | 0.02 |              |
| PARD3B PDZ1   | 0.10 | 0.01 |              |
| PARD3 PDZ3    | 0.09 | 0.07 |              |
| DFNB31 PDZ1   | 0.09 | 0.02 |              |
| ARHGAP21 PDZ1 | 0.09 | 0.06 |              |
| FRMPD3 PDZ1   | 0.07 | 0.05 |              |
| MYO18A PDZ1   | 0.06 | 0.02 |              |
| MAGI1 PDZ4    | 0.06 | 0.03 |              |
| NHERF3 PDZ2   | 0.05 | 0.01 |              |

|               |       |      |
|---------------|-------|------|
| PDLIM3 PDZ1   | 0.05  | 0.01 |
| LIN7C PDZ1    | 0.05  |      |
| NHERF4 PDZ1   | 0.05  | 0.01 |
| PDLIM1 PDZ1   | 0.04  | 0.07 |
| MAGI1 PDZ6    | 0.04  |      |
| ARHGEF12 PDZ1 | 0.04  | 0.00 |
| MPDZ PDZ9     | 0.03  | 0.13 |
| CARD14 PDZ1   | 0.03  | 0.05 |
| ARHGAP23 PDZ1 | 0.03  | 0.09 |
| CNKSR2 PDZ1   | 0.03  | 0.01 |
| CASK PDZ1     | 0.03  | 0.08 |
| SDCBP2 PDZ1   | 0.03  | 0.07 |
| MAGI3 PDZ3    | 0.03  | 0.05 |
| LMO7 PDZ1     | 0.03  | 0.07 |
| PPP1R9A PDZ1  | 0.02  | 0.00 |
| SCRIB PDZ1    | 0.02  |      |
| PTPN13 PDZ4   | 0.02  | 0.15 |
| MAGI2 PDZ6    | 0.02  | 0.03 |
| MAGI3 PDZ1    | 0.02  | 0.07 |
| HTRA1 PDZ1    | 0.02  | 0.06 |
| GRIP2 PDZ2    | 0.02  | 0.02 |
| LDB3 PDZ1     | 0.02  | 0.02 |
| PSMD9 PDZ1    | 0.02  | 0.01 |
| InaDl PDZ5    | 0.02  | 0.04 |
| TJP1 PDZ2     | 0.01  | 0.02 |
| PSCDBP PDZ1   | 0.01  | 0.04 |
| LNK2 PDZ4     | 0.01  | 0.06 |
| PDZD11 PDZ1   | 0.01  | 0.02 |
| PPP1R9B PDZ1  | 0.01  | 0.01 |
| CARD11 PDZ1   | 0.01  | 0.03 |
| DVL3 PDZ1     | 0.01  | 0.08 |
| PDZRN3 PDZ2   | 0.01  |      |
| InaDl PDZ9    | 0.01  | 0.04 |
| AHNAK1 PDZ1   | 0.00  |      |
| CNKSR3 PDZ1   | 0.00  |      |
| SIPA1L1 PDZ1  | 0.00  | 0.03 |
| MPDZ PDZ7     | 0.00  | 0.02 |
| RADIL PDZ1    | 0.00  | 0.06 |
| PDZD7 PDZ1    | 0.00  | 0.06 |
| MAST4 PDZ1    | 0.00  | 0.04 |
| GRIP2 PDZ5    | 0.00  | 0.03 |
| SNTG1 PDZ1    | -0.01 | 0.02 |
| PDZD2 PDZ4    | -0.01 | 0.01 |

|              |       |      |
|--------------|-------|------|
| InaD1 PDZ2   | -0.01 | 0.01 |
| GRIP1 PDZ3   | -0.01 |      |
| DEPTOR PDZ1  | -0.01 |      |
| InaD1 PDZ7   | -0.01 | 0.08 |
| MPDZ PDZ4    | -0.01 | 0.02 |
| DLG5 PDZ4    | -0.01 | 0.04 |
| LNK2 PDZ2    | -0.01 | 0.02 |
| GRIP1 PDZ1   | -0.01 | 0.10 |
| SNTB1 PDZ1   | -0.01 | 0.10 |
| InaD1 PDZ4   | -0.01 | 0.04 |
| PDZRN3 PDZ1  | -0.01 | 0.13 |
| PARD3B PDZ3  | -0.01 | 0.02 |
| LIN7B PDZ1   | -0.01 | 0.05 |
| SDCBP2 PDZ2  | -0.01 | 0.04 |
| DLG2 PDZ1    | -0.01 | 0.02 |
| NHERF3 PDZ3  | -0.01 | 0.02 |
| TJP1 PDZ1    | -0.01 | 0.05 |
| MLLT4 PDZ1   | -0.01 | 0.01 |
| DLG3 PDZ3    | -0.02 | 0.01 |
| LAP2 PDZ1    | -0.02 | 0.09 |
| RIMS2 PDZ1   | -0.02 | 0.11 |
| RGS12 PDZ1   | -0.02 | 0.03 |
| DLG4 PDZ2    | -0.02 | 0.01 |
| SCRIB PDZ4   | -0.02 | 0.02 |
| PARD3 PDZ2   | -0.02 | 0.02 |
| SHROOM4 PDZ1 | -0.02 | 0.07 |
| PTPN13 PDZ3  | -0.02 | 0.02 |
| MPP4 PDZ1    | -0.02 | 0.04 |
| PTPN13 PDZ1  | -0.02 | 0.02 |
| NHERF4 PDZ3  | -0.02 | 0.03 |
| RIMS1 PDZ1   | -0.02 | 0.07 |
| PDZRN4 PDZ2  | -0.02 | 0.00 |
| NOS1 PDZ1    | -0.02 | 0.00 |
| FRMPD2 PDZ1  | -0.02 | 0.05 |
| LNK1 PDZ4    | -0.02 | 0.06 |
| PDZD9 PDZ1   | -0.02 | 0.11 |
| GIPC3 PDZ1   | -0.02 | 0.05 |
| DLG5 PDZ2    | -0.03 | 0.02 |
| STXB4 PDZ1   | -0.03 | 0.07 |
| GRID2IP PDZ1 | -0.03 | 0.02 |
| SIPA1L2 PDZ1 | -0.03 | 0.00 |
| SCRIB PDZ2   | -0.03 | 0.06 |
| PRX PDZ1     | -0.03 | 0.01 |

|              |       |      |
|--------------|-------|------|
| PDZD2 PDZ2   | -0.03 | 0.02 |
| FRMPD1 PDZ1  | -0.03 | 0.03 |
| InaD1 PDZ6   | -0.03 | 0.00 |
| MAGI1 PDZ1   | -0.03 | 0.06 |
| PDZD7 PDZ2   | -0.03 | 0.03 |
| PDZD2 PDZ3   | -0.03 | 0.02 |
| MPP5 PDZ1    | -0.03 | 0.01 |
| SNTA1 PDZ1   | -0.03 | 0.03 |
| MAGI2 PDZ2   | -0.03 | 0.01 |
| PDZD2 PDZ6   | -0.03 | 0.05 |
| PICK1 PDZ1   | -0.03 |      |
| DLG4 PDZ3    | -0.03 | 0.05 |
| APBA2 PDZ1   | -0.03 |      |
| FRMPD2 PDZ3  | -0.03 | 0.03 |
| GORASP2 PDZ1 | -0.03 | 0.04 |
| MAGI3 PDZ6   | -0.03 | 0.01 |
| MPDZ PDZ6    | -0.03 | 0.03 |
| MPDZ PDZ13   | -0.03 | 0.03 |
| MAGI1 PDZ2   | -0.04 | 0.00 |
| APBA1 PDZ2   | -0.04 |      |
| MAGI2 PDZ5   | -0.04 | 0.02 |
| RGS3 PDZ1    | -0.04 | 0.07 |
| DLG3 PDZ1    | -0.04 | 0.06 |
| PDLIM4 PDZ1  | -0.04 | 0.00 |
| MAGI2 PDZ1   | -0.04 | 0.01 |
| MAGI1 PDZ3   | -0.04 | 0.01 |
| MPP3 PDZ1    | -0.04 | 0.02 |
| IL16 PDZ3    | -0.04 | 0.01 |
| GRIP2 PDZ7   | -0.04 | 0.06 |
| AHNAK2 PDZ1  | -0.04 |      |
| SIPA1 PDZ1   | -0.04 | 0.01 |
| MAGI2 PDZ4   | -0.04 | 0.01 |
| LIN7A PDZ1   | -0.04 | 0.05 |
| PDZD8 PDZ1   | -0.04 | 0.00 |
| DLG2 PDZ3    | -0.04 | 0.05 |
| GRIP2 PDZ3   | -0.04 | 0.00 |
| MPP7 PDZ1    | -0.04 | 0.00 |
| GRIP2 PDZ6   | -0.04 | 0.02 |
| GRIP1 PDZ7   | -0.04 | 0.02 |
| SHROOM3 PDZ1 | -0.04 | 0.03 |
| MPDZ PDZ3    | -0.04 | 0.07 |
| GIPC2 PDZ1   | -0.05 | 0.04 |
| PREX2 PDZ2   | -0.05 | 0.01 |

|              |       |      |
|--------------|-------|------|
| MPDZ PDZ2    | -0.05 | 0.03 |
| PREX1 PDZ2   | -0.05 | 0.00 |
| MAGI3 PDZ2   | -0.05 | 0.00 |
| PDZRN4 PDZ1  | -0.05 | 0.06 |
| MPDZ PDZ1 2  | -0.05 | 0.01 |
| PCLO PDZ1    | -0.05 | 0.01 |
| MPP6 PDZ1    | -0.05 | 0.00 |
| PDLIM7 PDZ1  | -0.05 | 0.00 |
| SYNPO2L PDZ1 | -0.05 | 0.04 |
| PTPN13 PDZ5  | -0.05 | 0.04 |
| SNTG2 PDZ1   | -0.05 | 0.02 |
| SYNP2 PDZ1   | -0.05 | 0.02 |
| MPDZ PDZ11   | -0.05 | 0.04 |
| HTRA4 PDZ1   | -0.05 | 0.01 |
| MAGI3 PDZ4   | -0.05 | 0.01 |
| DFNB31 PDZ2  | -0.05 | 0.02 |
| PDLIM2 PDZ1  | -0.05 | 0.00 |
| SIPA1L3 PDZ1 | -0.05 | 0.02 |
| MPDZ PDZ5    | -0.05 | 0.04 |
| PDZD4 PDZ1   | -0.05 | 0.02 |
| PARD6G PDZ1  | -0.05 | 0.00 |
| MPDZ PDZ8    | -0.06 | 0.03 |
| HTRA3 PDZ1   | -0.06 | 0.00 |
| IL16 PDZ1    | -0.06 | 0.03 |
| PDZD7 PDZ3   | -0.06 | 0.05 |
| RAPGEF2 PDZ1 | -0.06 |      |
| MAGI2 PDZ3   | -0.06 | 0.01 |
| LRRC7 PDZ1   | -0.06 | 0.01 |
| GORASP1 PDZ1 | -0.06 | 0.06 |
| DLG5 PDZ3    | -0.06 | 0.08 |
| SYNJ2BP PDZ1 | -0.06 | 0.02 |
| InaD1 PDZ3   | -0.06 | 0.05 |
| APBA2 PDZ2   | -0.06 | 0.01 |
| RAPGEF6 PDZ1 | -0.06 | 0.02 |
| NHERF3 PDZ4  | -0.06 | 0.19 |
| MAGIX PDZ1   | -0.06 | 0.01 |
| NHERF4 PDZ2  | -0.06 | 0.10 |
| LNK1 PDZ1    | -0.07 | 0.04 |
| DLG1 PDZ2    | -0.07 | 0.03 |
| MPDZ PDZ1 0  | -0.07 | 0.01 |
| LNK1 PDZ2    | -0.07 |      |
| PARD3B PDZ2  | -0.07 | 0.06 |
| LNK1 PDZ3    | -0.07 | 0.03 |

|             |       |      |
|-------------|-------|------|
| TJP2 PDZ1   | -0.07 | 0.03 |
| GRIP1 PDZ2  | -0.07 | 0.02 |
| GRIP1 PDZ5  | -0.07 | 0.03 |
| LNK2 PDZ1   | -0.07 | 0.01 |
| INTU PDZ1   | -0.07 | 0.05 |
| MPDZ PDZ1   | -0.07 | 0.01 |
| MPP1 PDZ1   | -0.07 | 0.05 |
| FRMPD2 PDZ2 | -0.07 | 0.03 |
| DLG1 PDZ3   | -0.07 | 0.02 |
| PDLIM5 PDZ1 | -0.08 | 0.02 |
| SDCBP PDZ1  | -0.08 | 0.02 |
| HTRA2 PDZ1  | -0.08 | 0.01 |
| TIAM1 PDZ1  | -0.08 | 0.04 |
| APBA1 PDZ1  | -0.08 |      |
| RHPN2 PDZ1  | -0.08 | 0.04 |
| TJP3 PDZ2   | -0.08 | 0.08 |
| GRIP2 PDZ4  | -0.08 | 0.09 |
| SNTB2 PDZ1  | -0.08 | 0.07 |
| PAR6A PDZ1  | -0.08 | 0.00 |
| TJP3 PDZ3   | -0.08 | 0.01 |
| SDCBP PDZ2  | -0.09 | 0.04 |
| InaD1 PDZ10 | -0.09 | 0.04 |
| IL16 PDZ4   | -0.09 | 0.00 |
| PTPN13 PDZ2 | -0.09 | 0.10 |
| GOPC PDZ1   | -0.09 | 0.02 |
| TX1B3 PDZ1  | -0.09 | 0.04 |
| PDZD2 PDZ1  | -0.09 | 0.02 |
| IL16 PDZ2   | -0.09 | 0.03 |
| APBA3 PDZ2  | -0.10 |      |
| LIMK1 PDZ1  | -0.10 | 0.08 |
| GRIP1 PDZ4  | -0.10 | 0.06 |
| DLG5 PDZ1   | -0.10 |      |
| PREX1 PDZ1  | -0.10 | 0.05 |
| PAR6B PDZ1  | -0.10 | 0.01 |
| TJP3 PDZ1   | -0.10 | 0.02 |
| TJP2 PDZ3   | -0.10 |      |
| APBA3 PDZ1  | -0.11 | 0.18 |
| LIMK2 PDZ1  | -0.11 | 0.03 |
| GRIP2 PDZ1  | -0.11 | 0.13 |
| USH1C PDZ3  | -0.11 | 0.01 |
| PREX2 PDZ1  | -0.11 | 0.06 |
| NHERF4 PDZ4 | -0.11 | 0.08 |
| MPP2 PDZ1   | -0.12 | 0.02 |

|               |       |      |
|---------------|-------|------|
| TJP2 PDZ2     | -0.12 | 0.04 |
| TIAM2 PDZ1    | -0.12 | 0.13 |
| PDZD2 PDZ5    | -0.13 | 0.02 |
| USH1C PDZ1    | -0.13 |      |
| DVL1 PDZ1     | -0.14 | 0.18 |
| DLG1 PDZ1     | -0.14 | 0.19 |
| TJP1 PDZ3     | -0.14 | 0.10 |
| ARHGEF11 PDZ1 | -0.18 | 0.19 |
| InaDl PDZ8    | -0.24 | 0.29 |
| DFNB31 PDZ3   | -0.24 | 0.33 |
| USH1C PDZ2    | -0.25 | 0.10 |
| DLG3 PDZ2     | -0.27 | 0.38 |
| GRIP1 PDZ6    | -0.27 | 0.36 |
| CNKSR1 PDZ1   | -0.31 | 0.38 |
| InaDl PDZ1    | -0.34 | 0.31 |
| DVL2 PDZ1     | -0.38 | 0.57 |
| DLG4 PDZ1     | -0.50 |      |
| LNK2 PDZ3     |       |      |
